# Supplementary material for: Estimating sensitivity of seabed habitats to disturbance by bottom trawling based on the longevity of benthic fauna
Source: PubMed Central journal article supplement (PMC6055734; doi:10.1002/eap.1731), 2018-05-24
Supplement: EAP-28-1302-s001.pdf [file EAP-28-1302-s001.pdf]

**Appendix S1**  
***Ecological Applications***

**Estimating sensitivity of seabed habitats to disturbance by bottom trawling based on the longevity of benthic fauna.**

Adriaan D. Rijnsdorp<sup>1,2</sup>, Stefan G. Bolam<sup>3</sup>, Clement Garcia<sup>3</sup>, Jan Geert Hiddink<sup>4</sup>, Niels T. Hintzen<sup>1</sup>, P. Daniel van Denderen<sup>5</sup>, Tobias van Kooten<sup>1,6</sup>

<sup>1</sup> Wageningen Marine Research, P.O. Box 68, 1970 AB IJmuiden, The Netherlands;

<sup>2</sup> Aquaculture and Fisheries Group, Wageningen University, P.O. Box 338, 6700 AH Wageningen, The Netherlands;

<sup>3</sup> The Centre for Environment, Fisheries and Aquaculture Science, Pakefield Road, Suffolk NR33 0HT, UK;

<sup>4</sup> School of Ocean Sciences, Bangor University, Menai Bridge, Anglesey, LL59 5AB, UK ;

<sup>5</sup> Centre for Ocean Life, National Institute of Aquatic Resources, Technical University of Denmark, Kemitorvet B-202, 2800 Kongens Lyngby, Denmark;

<sup>6</sup> Institute for Biodiversity and Ecosystem Dynamics, University of Amsterdam, Amsterdam, The Netherlands.

Corresponding author: Adriaan D. Rijnsdorp ([adriaan.rijnsdorp@wur.nl](mailto:adriaan.rijnsdorp@wur.nl))

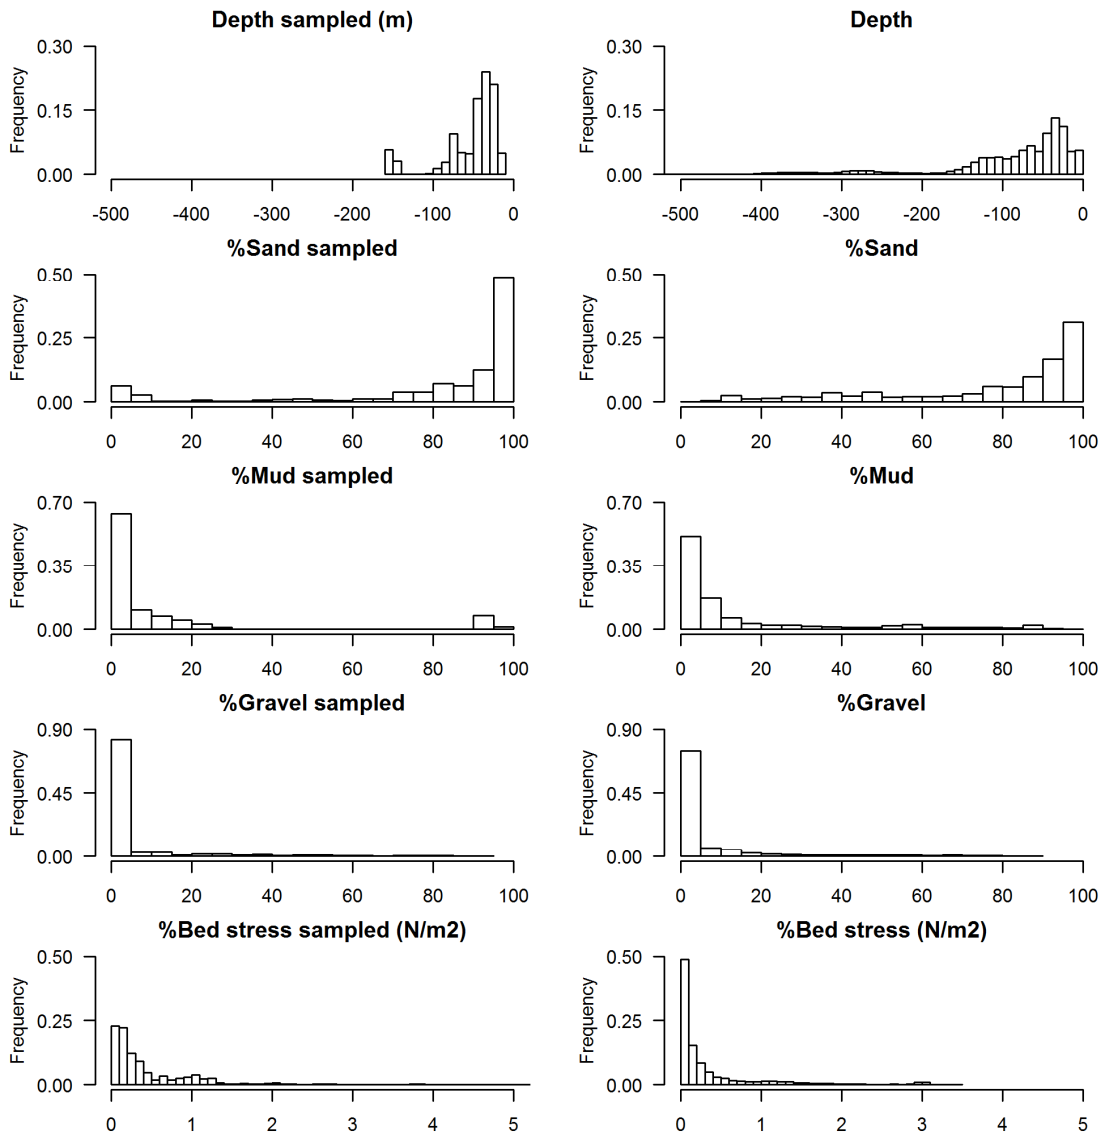

Figure S1. Frequency distribution of environmental variables of the benthos sampling stations (left) and the frequency distribution of environmental variables of all North Sea grid cells (right).
